# Supplementary material for: Biarylpyrimidines: a new class of ligand for high-order DNA recognitionElectronic supplementary information (ESI) available: experimental details of UV melting studies and example spectroscopic and analytical data. See http://www.rsc.org/suppdata/cc/b3/b301554h/
Source: Royal Society of Chemistry journal article supplement (doi:10.1039/b301554h), 2003-04-09
Supplement: b301554h.doc [file b301554h.doc]

**Electronic Supporting Information**

**Experimental Details of UV Melting Studies**

Calf Thymus (CT) DNA, poly[dA]·poly[dT] and poly[dT] DNA were purchased from Sigma as the sodium salts and used without further purification.

An aqueous buffer containing 10 mM Na2HPO4/NaH2PO4, 1 mM Na2EDTA, pH 7.00  0.01 was used for CT DNA melting experiments.

An aqueous buffer containing 10 mM sodium cacodylate, 300 mM NaCl, 0.1 mM Na2EDTA, pH 6.00  0.01 was used for triplex DNA melting experiments.

Concentrations of all DNA solutions were determined by UV spectrophotometry using the extinction coefficients: CT DNA, 260 = 12 824 M(base pairs)-1 cm-1; poly[dA]·poly[dT], 260 = 12 000 M(base pairs)-1 cm-1; poly[dT], 265 = 8 700 M(nucleotides)-1 cm-1. The poly[dA]·poly[dT]2 triplex was formed by mixing equimolar (i.e., base pairs to nucleotides) solutions of the poly[dA]·poly[dT] duplex and the poly[dT] single strand, then annealing by heating to 95 C followed by slow cooling overnight.

Ligands were dissolved in buffer or DMSO, ensuring that the ultimate concentration of DMSO was  1-2% v/v where used. DMSO calibration curves were used to correct the *T*m values. Ligand stock solutions were stored in the refrigerator (0­–5 C) when not in use.

Ultraviolet DNA melting curves were determined using a Varian-Cary 400 Bio UV/Visible Spectrophotometer, equipped with a Peltier temperature controller. Heating runs were typically performed between 40 and 95 C, heating at a rate of 1 C min-1, while continuously monitoring the absorbance at 260 nm. All melts were performed in 1 cm pathlength quartz cells. Solutions of DNA and the candidate ligand were prepared by direct mixing of a solution containing either CT DNA or triplex with aliquots from the ligand stock solution. Melting temperatures were determined from the primary data using the method of Wilson *et al*. (Chapter 15, Methods in Molecular Biology, Volume 90, DRUG-DNA INTERACTION PROTOCOLS, Edited by Keith R. Fox, Humana Press, Totowa, New Jersey, USA, 1997).

**Example Spectroscopic and Analytical Data**

**1f** free base H (CDCl3) 9.25 (d, *J* = 1.3 Hz, 1H), 8.08 (1/2AB, *J* = 8.4 Hz, 4H), 8.03 (d, *J* = 1.3 Hz, 1H), 7.46 (1/2AB, *J* = 8.4 Hz, 4H), 3.22 (t, *J* = 7.3 Hz, 4H), 2.70 (t, *J* = 7.3 Hz, 4H), 2.53 (m, 8H), 1.65 (m, 8H), 1.43 (m, 4H); C 164.5, 159.8, 141.8, 134.5, 128.4, 128.1, 112.3, 58.8, 55.2, 30.5, 26.6, 24.9; m/z (CI) 520 (M+H). HBr salt found: C, 43.55; H, 5.63; N, 6.50. C20H38N4S2·3HBr·4H2O requires C, 43.23; H, 5.92; N, 6.72 %. **2f** HBr salt H (d6-DMSO) 9.39 (s, 1H, 2-H), 9.20 (br s, 2H), 8.97 (br t, *J* = 5.2 Hz, 2H), 8.81 (s, 1H, 5-H), 8.53 (1/2AB, *J* = 8.3 Hz, 4H), 8.11 (1/2AB, *J* = 8.3 Hz, 4H), 3.69 (q, *J* = 5.7 Hz, 4H), 3.58 (m, 4H), 3.29 (q, *J* = 5.7 Hz, 4H), 2.98 (br q, *J* = 9.8 Hz, 4H), 1.82 (m, 4H), 1.70 (m, 6H), 1.43 (m, 2H); C (d6-DMSO)166.8, 163.6, 159.7, 139.4, 136.5, 128.4, 127.9, 114.0, 55.6, 52.9, 34.8, 23.1, 21.8; m/z (CI, free base): 541 (M+H). Found: C, 49.08; H, 5.49; N, 10.57. C32H40N6O2·3HBr requires: C, 49.06; H, 5.53; N, 10.73%.
